# Supplementary material for: Characterization of atmospheric microplastics in Hangzhou, a megacity of the Yangtze river delta, China
Source: Royal Society of Chemistry journal article supplement (doi:10.1039/d4ea00069b), 2024-01-01
Supplement: d4ea00069b1.pdf [file d4ea00069b1.pdf]

1 *Supporting Information for*  
2 **Characterization of atmospheric microplastics in Hangzhou, a Megacity of the**  
3 **Yangtze River Delta, China**

4

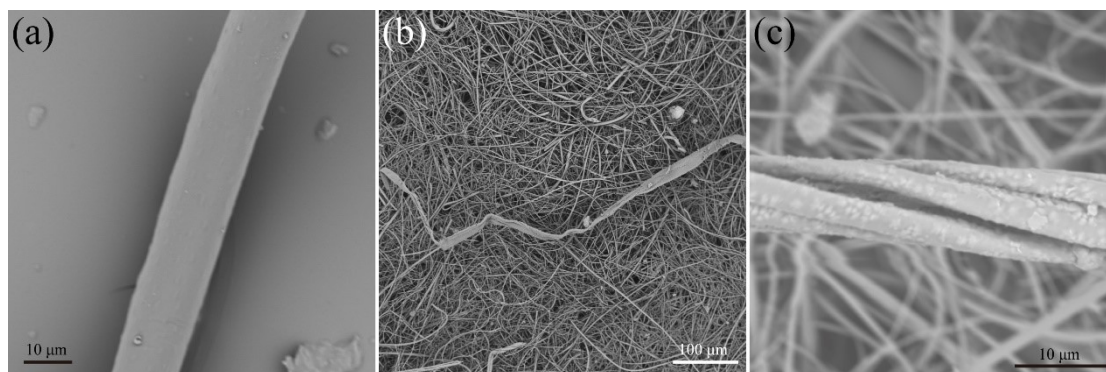

5  
6 Figure S1. SEM images depicting the morphology of atmospheric MPs: (a) smooth, (b)  
7 flattened, (c) twisted

8

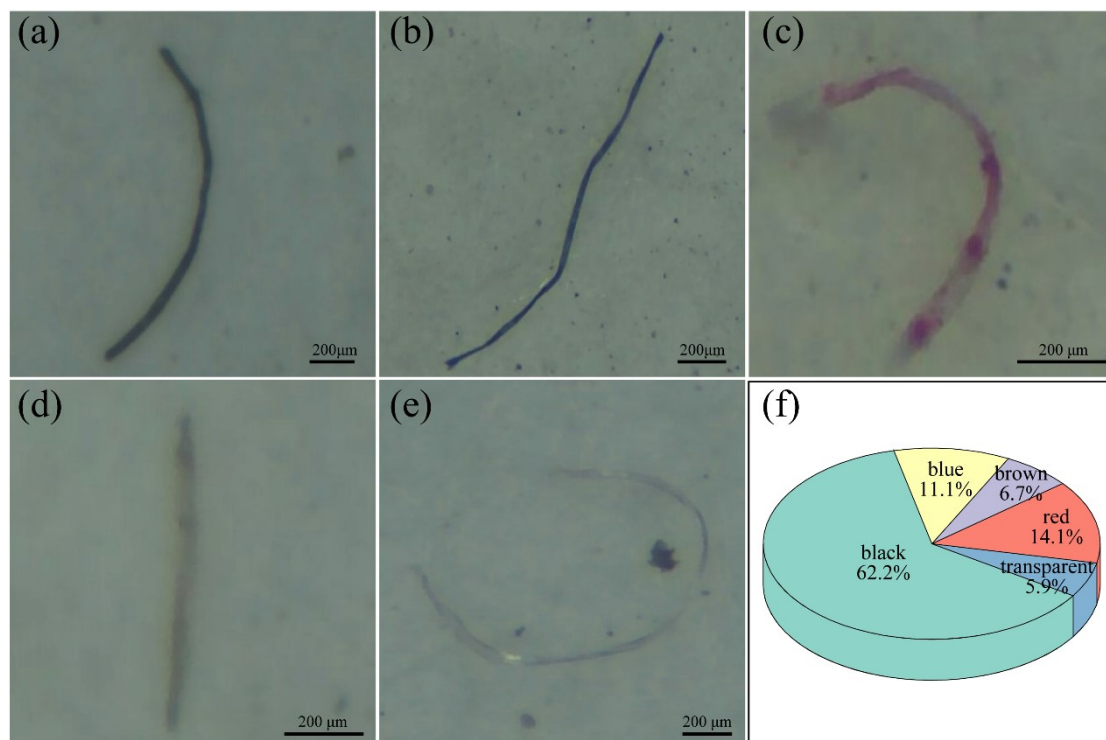

9  
10 Figure S2. Colors of atmospheric MPs: (a) black, (b) blue, (c) red, (d) brown, (e)  
11 transparent. (f) fractions of different atmospheric MPs colors.

12

13

14

15

16

17

18

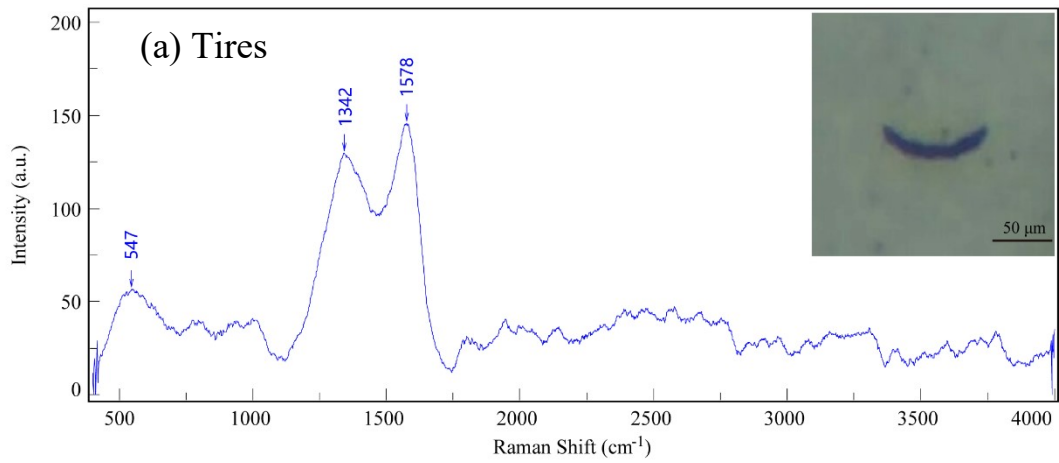

19

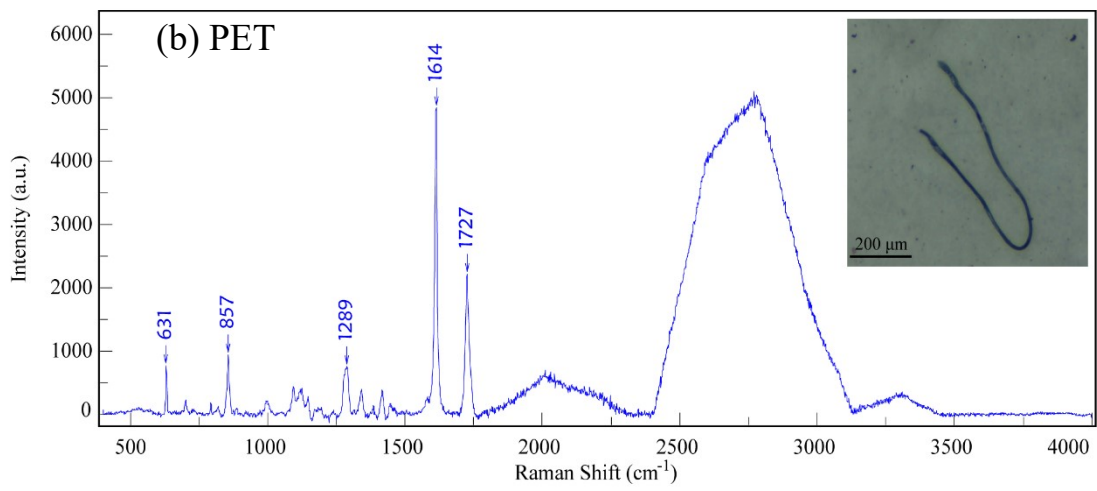

20

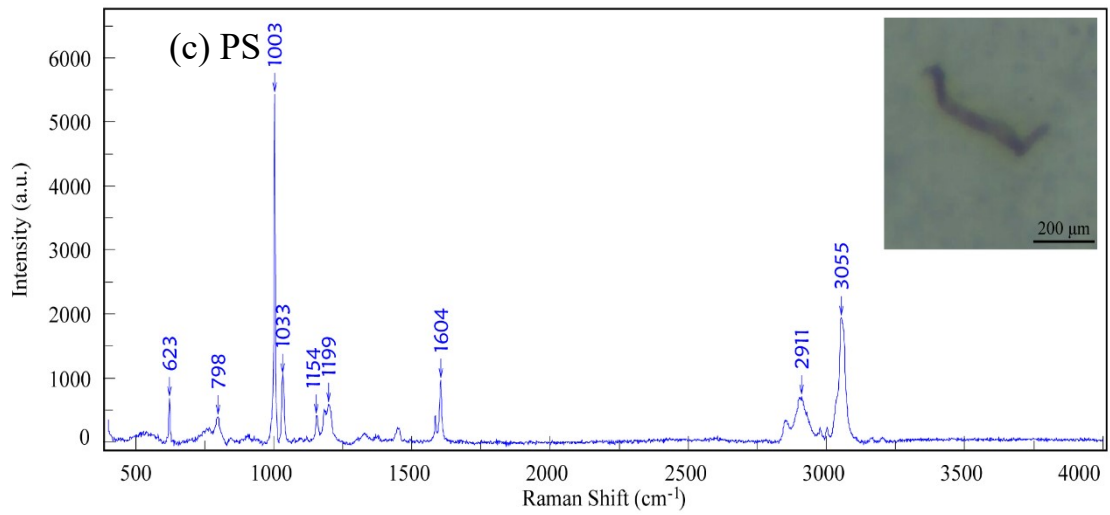

21

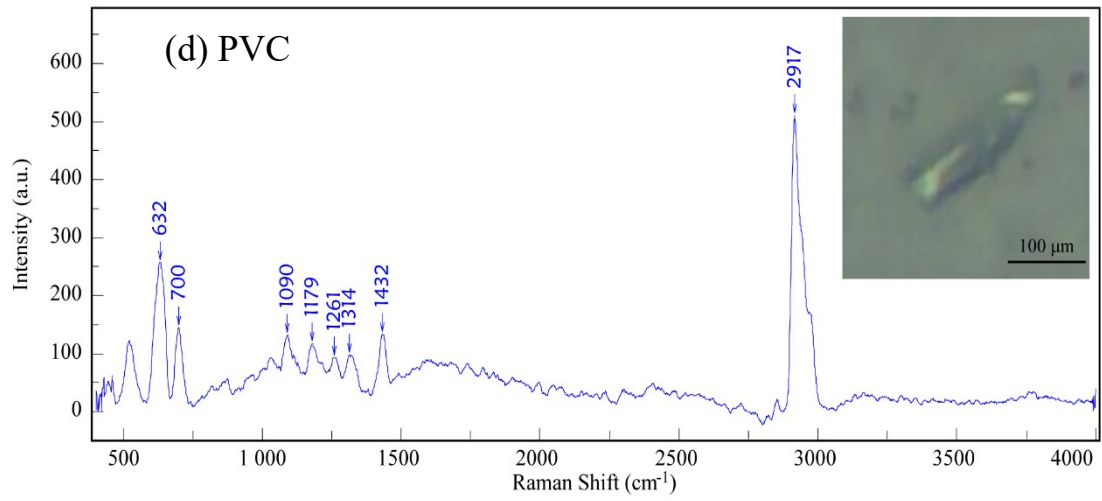

22

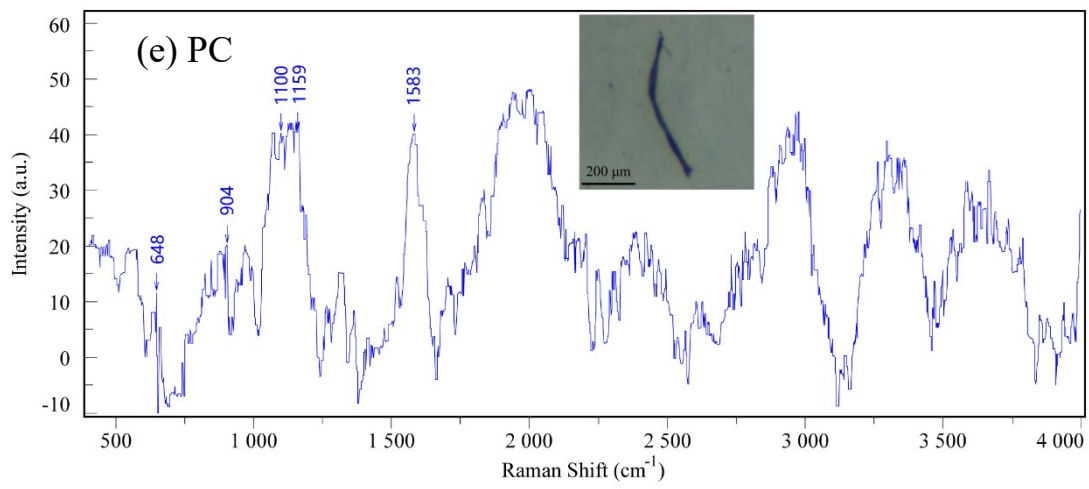

23

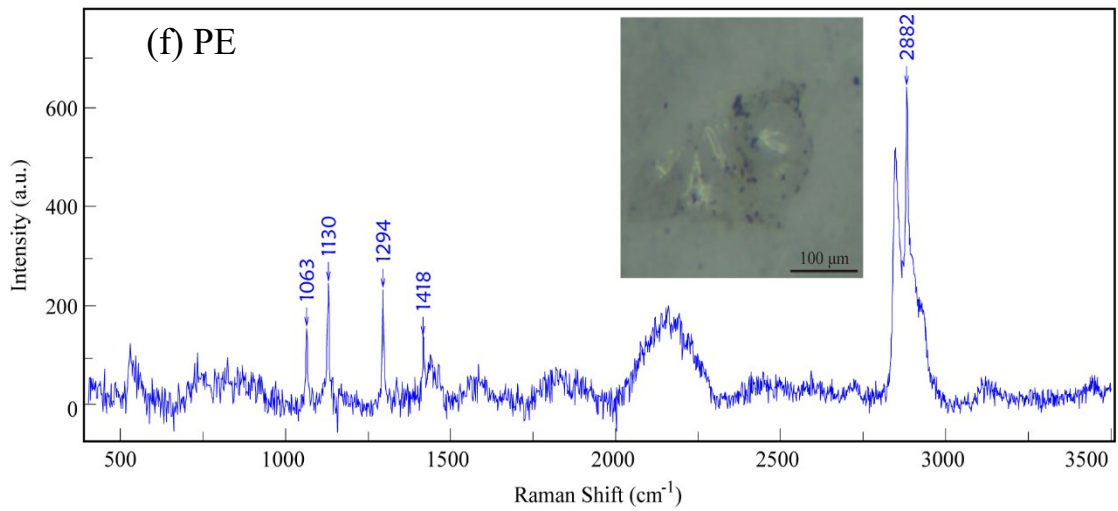

24

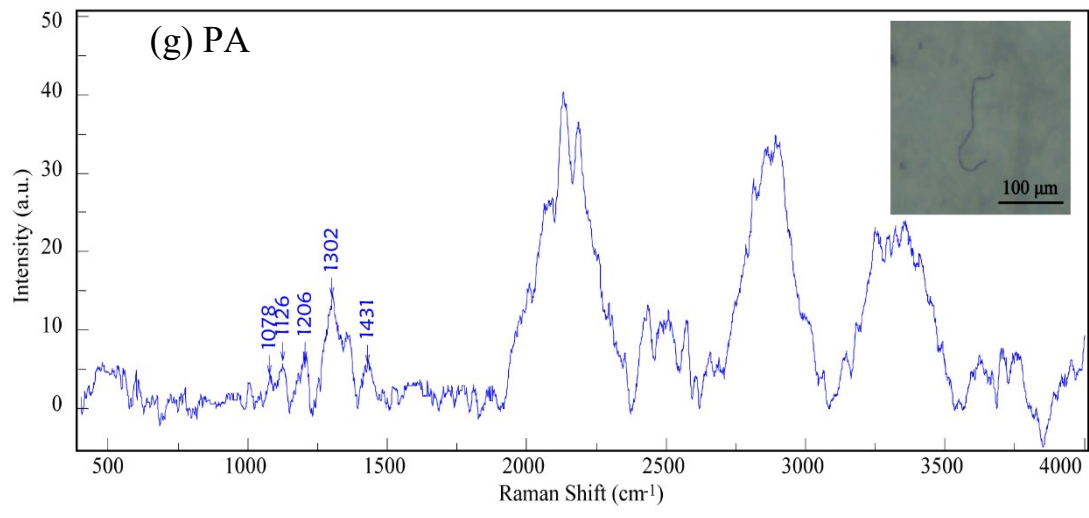

25

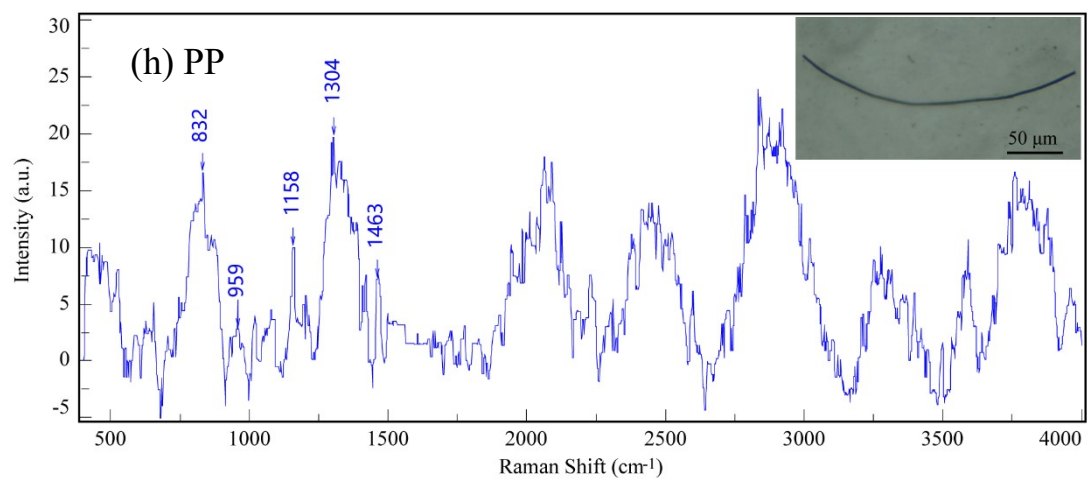

26

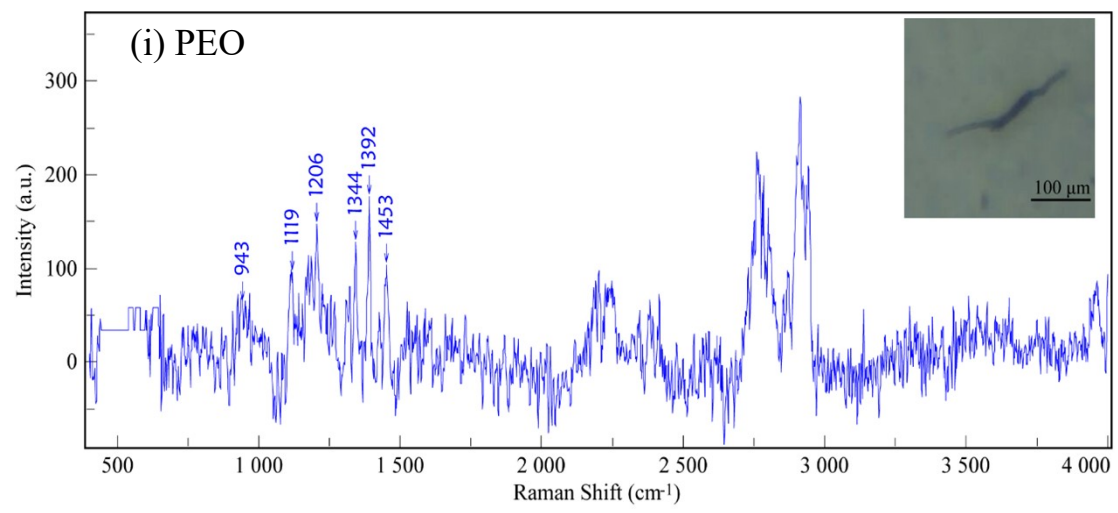

27

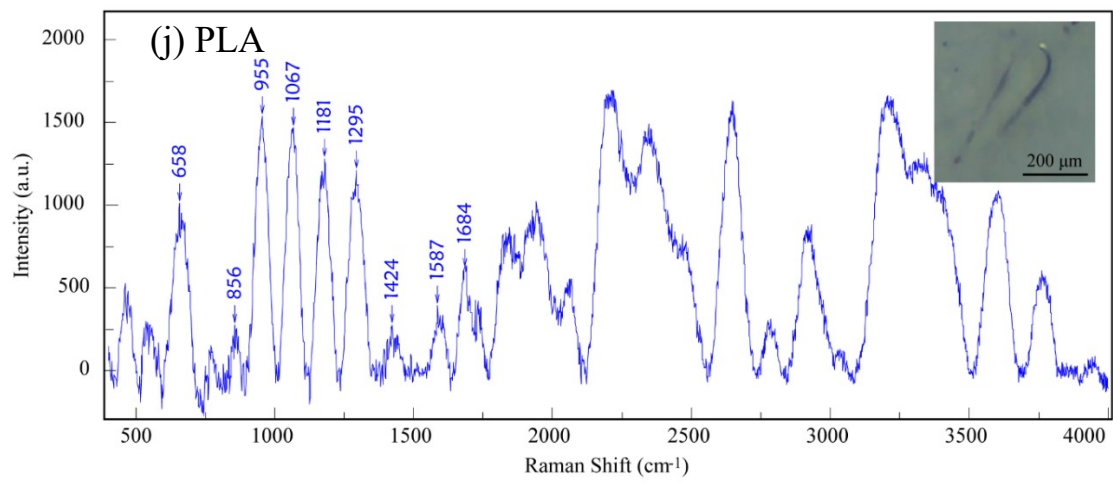

28  
29  
30  
31

Figure S3. Raman spectra and microscopic images of MPs

Table S1. Sample information of active sampling MPs

| Sample ID | Date  | Duration/h | Volume/m <sup>3</sup> |
|-----------|-------|------------|-----------------------|
| 1         | 12/5  | 6.1        | 1.83                  |
| 2         | 12/6  | 5.1        | 1.53                  |
| 3         | 12/11 | 6          | 1.8                   |
| 4         | 12/12 | 6          | 1.8                   |
| 5         | 12/13 | 6          | 1.8                   |
| 6         | 12/14 | 6          | 1.8                   |
| 7         | 12/30 | 5          | 1.5                   |
| 8         | 1/5   | 5          | 1.5                   |
| 9         | 1/6   | 6          | 1.8                   |
| 10        | 1/7   | 6          | 1.8                   |
| 11        | 1/8   | 6          | 1.8                   |
| 12        | 1/9   | 3.6        | 1.08                  |
| 13        | 1/13  | 6          | 1.8                   |
| 14        | 1/14  | 6          | 1.8                   |
| 15        | 3/19  | 6.1        | 1.83                  |
| 16        | 3/20  | 8          | 2.4                   |
| 17        | 4/15  | 9          | 2.7                   |
| 18        | 4/16  | 9          | 2.7                   |
| 19        | 5/3   | 9          | 2.7                   |
| 20        | 5/4   | 9          | 2.7                   |
| 21        | 11/10 | 11.6       | 3.48                  |
| 22        | 11/11 | 11.4       | 3.42                  |
| 23        | 11/12 | 11.5       | 3.45                  |
| 24        | 11/13 | 11.7       | 3.51                  |

33

34

35

36

Table S2. Sample information of atmospheric deposition MPs

| Sample ID | Start date | End date | Duration/days | Season |
|-----------|------------|----------|---------------|--------|
| 1         | 11/23      | 12/21    | 28            | winter |
| 2         | 12/5       | 12/16    | 11            | winter |
| 3         | 12/16      | 1/14     | 29            | winter |
| 4         | 1/14       | 3/19     | 65            | winter |
| 5         | 3/19       | 4/16     | 28            | spring |
| 6         | 4/16       | 5/20     | 34            | spring |
| 7         | 5/20       | 6/22     | 33            | summer |
| 8         | 6/22       | 7/20     | 28            | summer |
| 9         | 7/20       | 8/20     | 31            | summer |
| 10        | 8/20       | 9/21     | 32            | autumn |
| 11        | 9/21       | 11/23    | 63            | autumn |
| 12        | 11/16      | 12/5     | 19            | autumn |

38

39

40 Table S3. Monthly mean meteorological data from observations collected at Mantou  
 41 Mountain reference weather station (WMO 584570, 30.23 °N, 120.17 °E) in  
 42 Hangzhou

| Season             | Year/<br>Month | Temperature<br>(°C) | RH<br>(%) | Precipitation<br>(mm) | Wind<br>speed<br>(m/s) | Visibilit<br>y<br>(km) |
|--------------------|----------------|---------------------|-----------|-----------------------|------------------------|------------------------|
| <b>Autum<br/>n</b> | 2019/11        | 14.4                | 69        | 27                    | 2.1                    | 8.1                    |
|                    | 2019/12        | 9.1                 | 74        | 188                   | 2.0                    | 5.7                    |
| <b>Winter</b>      | 2020/01        | 7.3                 | 81        | 459                   | 2.1                    | 5.3                    |
|                    | 2020/02        | 9.8                 | 73        | 164                   | 2.0                    | 9.2                    |
|                    | 2020/03        | 13.2                | 72        | 304                   | 2.0                    | 8.9                    |
| <b>Spring</b>      | 2020/04        | 16.5                | 60        | 101                   | 2.2                    | 9.9                    |
|                    | 2020/05        | 23.6                | 71        | 300                   | 2.2                    | 8.7                    |
| <b>Summe<br/>r</b> | 2020/06        | 26.2                | 84        | 768                   | 1.9                    | 9.5                    |
|                    | 2020/07        | 26.9                | 85        | 478                   | 1.8                    | 10.2                   |
|                    | 2020/08        | 31.1                | 64        | 134                   | 2.4                    | 18.9                   |
| <b>Autum<br/>n</b> | 2020/09        | 23.9                | 74        | 444                   | 1.8                    | 11.5                   |
|                    | 2020/10        | 19.1                | 70        | 80                    | 2.1                    | 13.6                   |
|                    | 2020/11        | 15                  | 73        | 67                    | 2.1                    | 9.1                    |

43

44

45

Table S4. Densities of different polymer

| Polymer type | Density (g/cm <sup>3</sup> ) |
|--------------|------------------------------|
| PA           | 1.24                         |
| PC           | 1.21                         |
| PE           | 0.94                         |
| PES          | 1.40                         |
| PET          | 1.37                         |
| PP           | 0.84                         |
| PS           | 1.05                         |
| PVC          | 1.38                         |
| Tires        | 1.18                         |

46
